# Supplementary material for: Enhanced Control of Bladder-Associated Tumors Using Shrimp Anti-Lipopolysaccharide Factor (SALF) Antimicrobial Peptide as a Cancer Vaccine Adjuvant in Mice
Source: MDPI journal article supplement (doi:10.3390/md13053241), 2015-05-21
Supplement: s1 [file s1]

## Supplementary Information

**Table S1.** Mice received three doses of vaccine, and were injected with MBT-2 tumor cells on the 28th day. Tumor volume was measured using calipers on the 7th, 14th, and 21st day (Group of 5 mice;  $n = 3$ ).

| Group              | 0 (Day) | 7 (Day)        | 14 (Day)        | 21 (Day)         |
|--------------------|---------|----------------|-----------------|------------------|
| <b>M50</b>         | 0       | 10.40 ± 7.12   | 177.80 ± 18.23  | 1622.80 ± 126.70 |
| <b>M100</b>        | 0       | 20.70 ± 6.23   | 255.20 ± 20.21  | 1802.10 ± 132.20 |
| <b>M200</b>        | 0       | 13.70 ± 7.21   | 323.20 ± 55.30  | 1900.30 ± 178.20 |
| <b>M200 + S200</b> | 0       | 9.30 ± 7.12    | 157.80 ± 45.20  | 322.80 ± 27.30   |
| <b>M200 + S100</b> | 0       | 20.40 ± 13.5   | 144.20 ± 55.10  | 223.60 ± 23.40   |
| <b>M200 + S50</b>  | 0       | 32.10 ± 3.10   | 110.40 ± 26.10  | 244.20 ± 38.20   |
| <b>M100 + S200</b> | 0       | 5.40 ± 4.22    | 90.20 ± 32.20   | 260.10 ± 34.20   |
| <b>M100 + S100</b> | 0       | 11.20 ± 1.70   | 101.20 ± 45.50  | 230.20 ± 20.10   |
| <b>M100 + S50</b>  | 0       | 23.10 ± 2.95   | 84.20 ± 32.50   | 250.20 ± 42.50   |
| <b>M50 + S200</b>  | 0       | 7.40 ± 4.32    | 41.80 ± 11.20   | 170.80 ± 34.20   |
| <b>M50 + S100</b>  | 0       | 0.80 ± 0.10    | 20.60 ± 9.20    | 115.00 ± 32.50   |
| <b>M50 + S50</b>   | 0       | 5.60 ± 2.54    | 50.20 ± 17.20   | 180.10 ± 23.50   |
| <b>T</b>           | 0       | 163.00 ± 99.00 | 944.20 ± 361.20 | 2858.40 ± 695.60 |

© 2015 by the authors; licensee MDPI, Basel, Switzerland. This article is an open access article distributed under the terms and conditions of the Creative Commons Attribution license (<http://creativecommons.org/licenses/by/4.0/>).
